# Supplementary material
Source: PubMed Central journal article supplement (PMC7001006)
Supplement: mmc1.pdf [file mmc1.pdf]

**Supplemental Information**

**DGCR8/ZFAT-AS1 Promotes CDX2 Transcription  
in a PRC2 Complex-Dependent Manner to Facilitate  
the Malignant Biological Behavior of Glioma Cells**

**Fangfang Zhang, Xuelei Ruan, Jun Ma, Xiaobai Liu, Jian Zheng, Yunhui Liu, Libo Liu, Shuyuan Shen, Lianqi Shao, Di Wang, Chunqing Yang, Heng Cai, Zhen Li, Ziyi Feng, and Yixue Xue**

# Figure S1

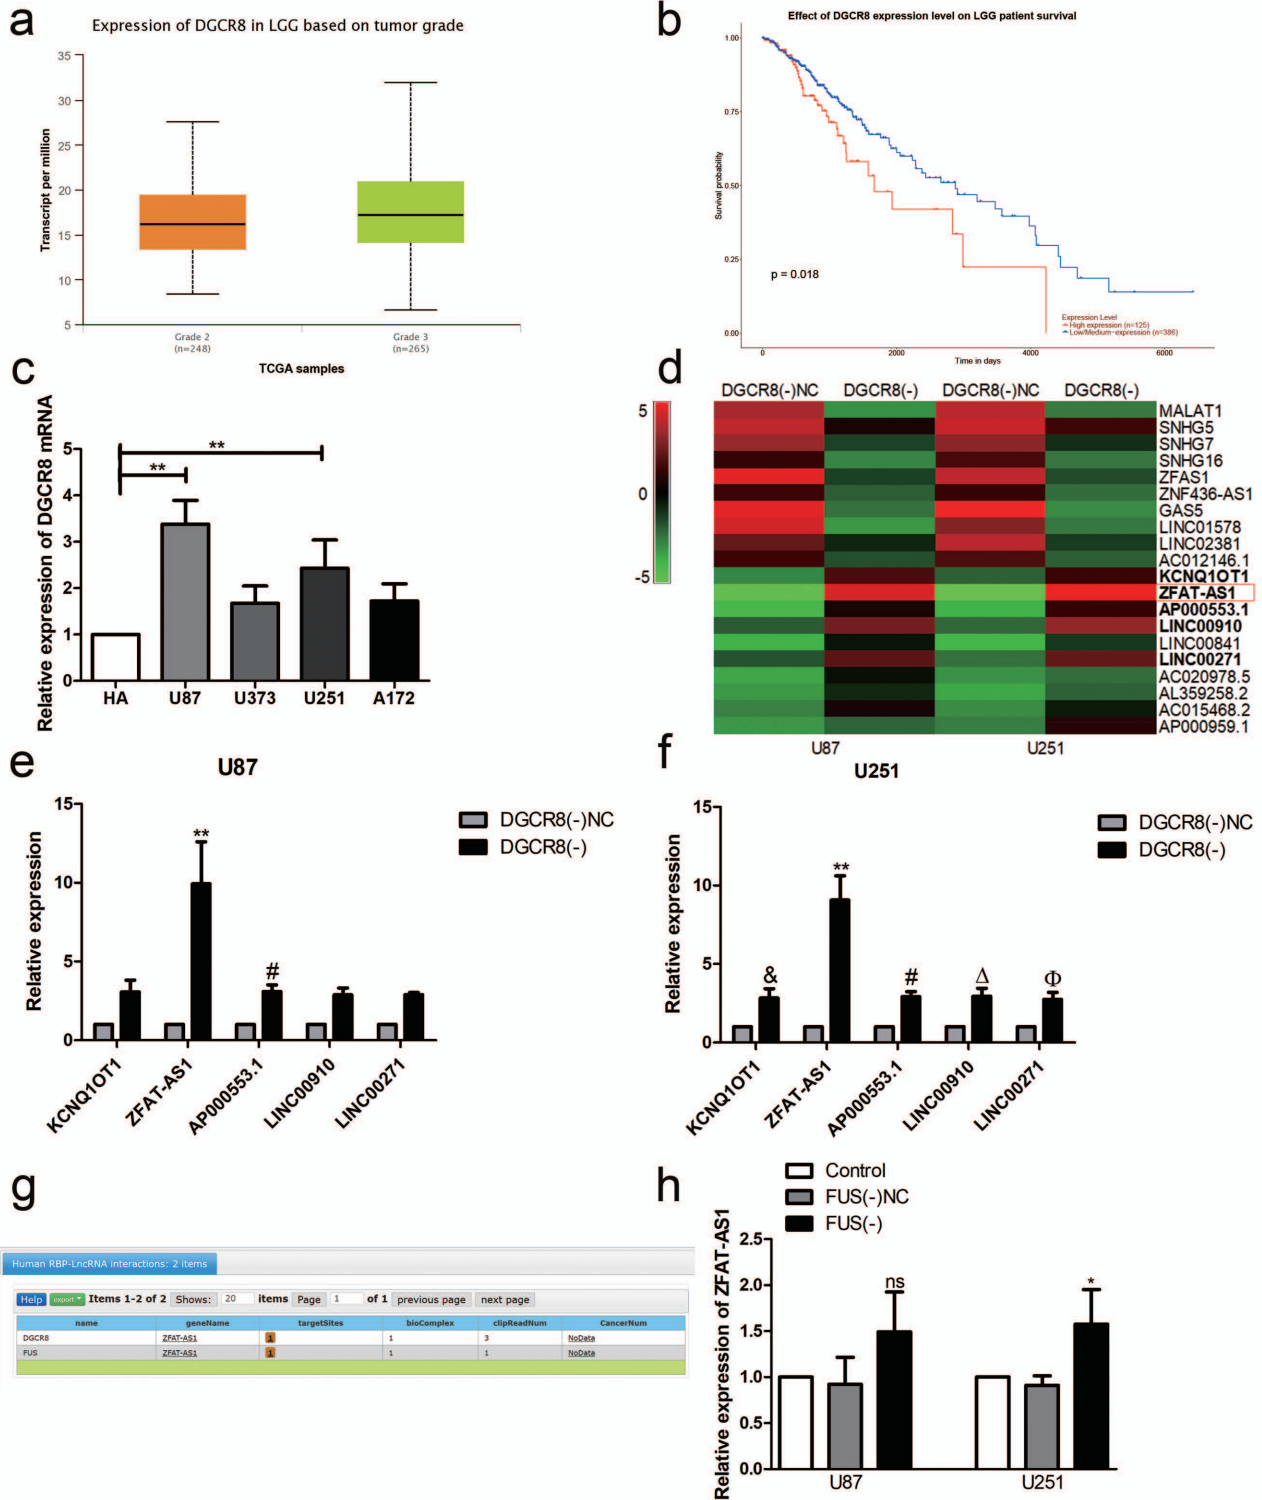

**Figure S1. Selected DGCR8 and ZFAT-AS1 as candidates.**  
**a** Expression of DGCR8 in low-grade gliomas (LGG) from TCGA samples. **b** Effect of DGCR8 expression level on LGG patient survival from database TCGA. **c** Expression of DGCR8 in different glioma cell lines. Data were presented as the mean  $\pm$  standard deviation (SD) ( $n=3$ , each group).  $**P < 0.01$  by Student's t-test. **d** LncRNAs gene expression profiles as obtained from samples of three groups in DGCR8 knockdown. Group treated with the short-hairpin RNA against DGCR8 (DGCR8(-)), Group treated with negative control empty vector plasmid with non-targeting sequence (DGCR8(-)NC). **e f** qRT-PCR was performed to validate the selected molecules. Data were presented as the mean  $\pm$  SD ( $n=3$ , each group).  $**P < 0.01$  vs. DGCR8(-)NC group;  $\&/\#/\Delta/\Phi/P < 0.05$  vs. DGCR8(-)NC group by one-way ANOVA. **g** RBPs interacted with ZFAT-AS1 were DGCR8 and FUS according to a bioinformatics database (starBase v2.0). **h** Influence of FUS on the expression of ZFAT-AS1. Data were presented as the mean  $\pm$  SD ( $n=3$ , each group).  $*P < 0.05$  vs. FUS(-)NC group by one-way ANOVA.

**Figure S2**

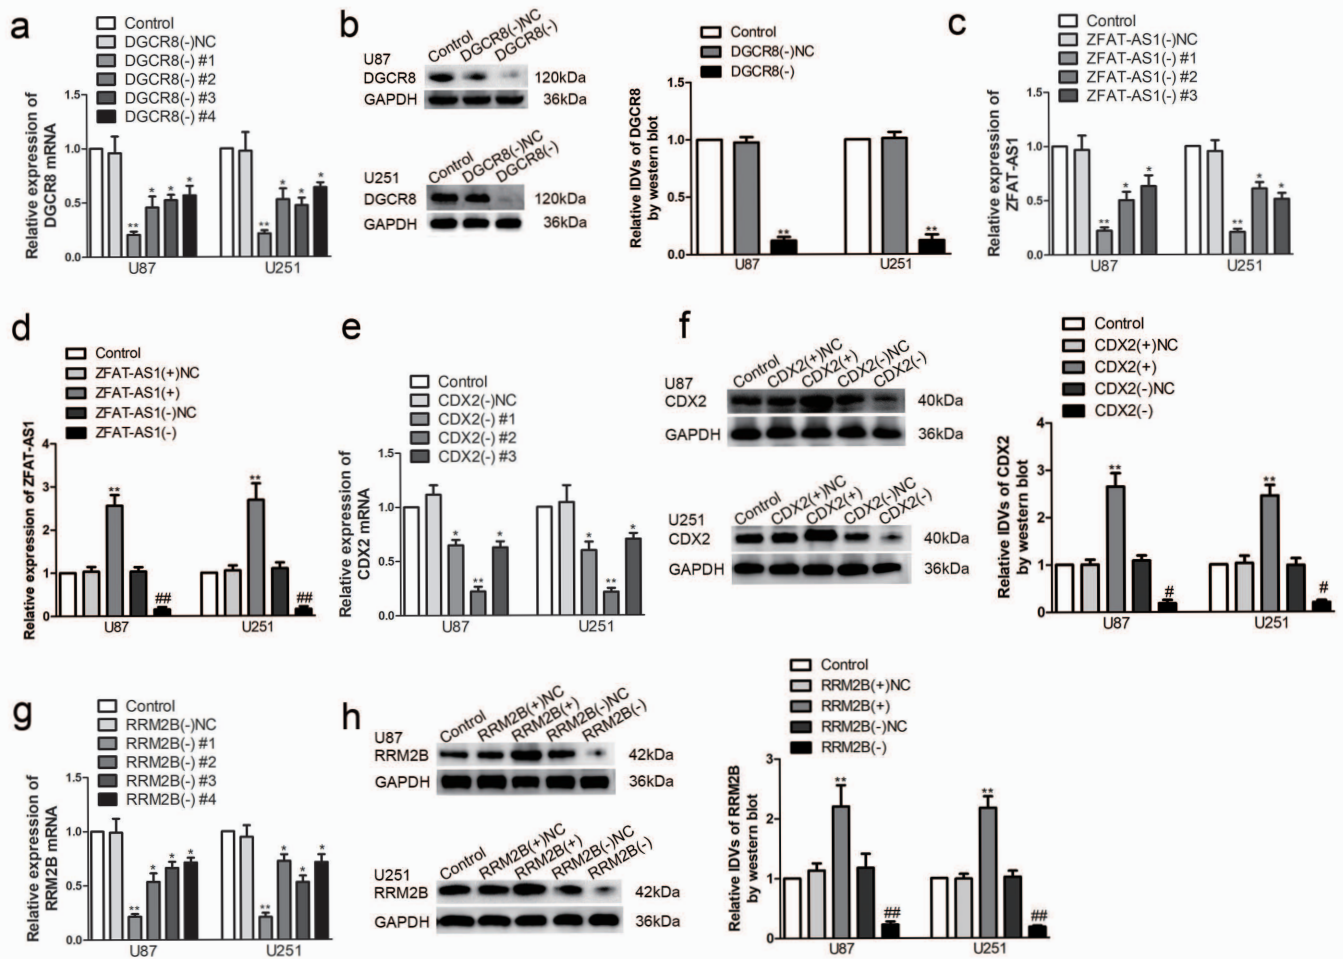

**Figure S2. Transfection efficiency of DGCR8, ZFAT-AS1, CDX2 and RRM2B.**  
**a** Efficiency of transient knockdown of DGCR8 four different sites. **b** Efficiency of stable transfection of DGCR8 site #1. Group treated with the short-hairpin RNA against DGCR8 (DGCR8(-)), Group treated with negative control empty vector plasmid with non-targeting sequence (DGCR8(-)NC). The integrated density values (IDVs) of the blot bands were statistic analyzed. Data were presented as the mean  $\pm$  standard deviation (SD) (n=3, each group). \* $P$  < 0.05 vs. DGCR8(-)NC group; \*\* $P$  < 0.01 vs. DGCR8(-)NC group by one-way ANOVA. **c** Efficiency of transient knockdown of ZFAT-AS1 three different sites. Data were presented as the mean  $\pm$  SD (n=3, each group). \* $P$  < 0.05 vs. ZFAT-AS1(-)NC group; \*\* $P$  < 0.01 vs. ZFAT-AS1(-)NC group by one-way ANOVA. **d** Efficiency of stable transfection of ZFAT-AS1 over-expression and knockdown site #1. Data were presented as the mean  $\pm$  SD (n=3, each group). \*\* $P$  < 0.01 vs. ZFAT-AS1(+)-NC group; ### $P$  < 0.01 vs. ZFAT-AS1(-)NC group by one-way ANOVA. **e** Efficiency of transient knockdown of CDX2 three different sites. Data were presented as the mean  $\pm$  SD (n=3, each group). \* $P$  < 0.05 vs. CDX2(-)NC group; \*\* $P$  < 0.01 vs. CDX2(-)NC group by one-way ANOVA. **f** Efficiency of stable transfection of CDX2 over-expression or knockdown site #2. Data were presented as the mean  $\pm$  SD (n=3, each group). \*\* $P$  < 0.01 vs. CDX2(+)-NC group; # $P$  < 0.05 vs. CDX2(-)NC group; ### $P$  < 0.01 vs. CDX2(-)NC group by one-way ANOVA. **g** Efficiency of transient knockdown of RRM2B four different sites. Data were presented as the mean  $\pm$  SD (n=3, each group). \* $P$  < 0.05 vs. RRM2B(-)NC group; \*\* $P$  < 0.01 vs. RRM2B(-)NC group by one-way ANOVA. **h** Efficiency of stable transfection of RRM2B over-expression or knockdown site #1. Data were presented as the mean  $\pm$  SD (n=3, each group). \*\* $P$  < 0.01 vs. RRM2B(+)-NC group; ### $P$  < 0.01 vs. RRM2B(-)NC group by one-way ANOVA.

# Figure S3

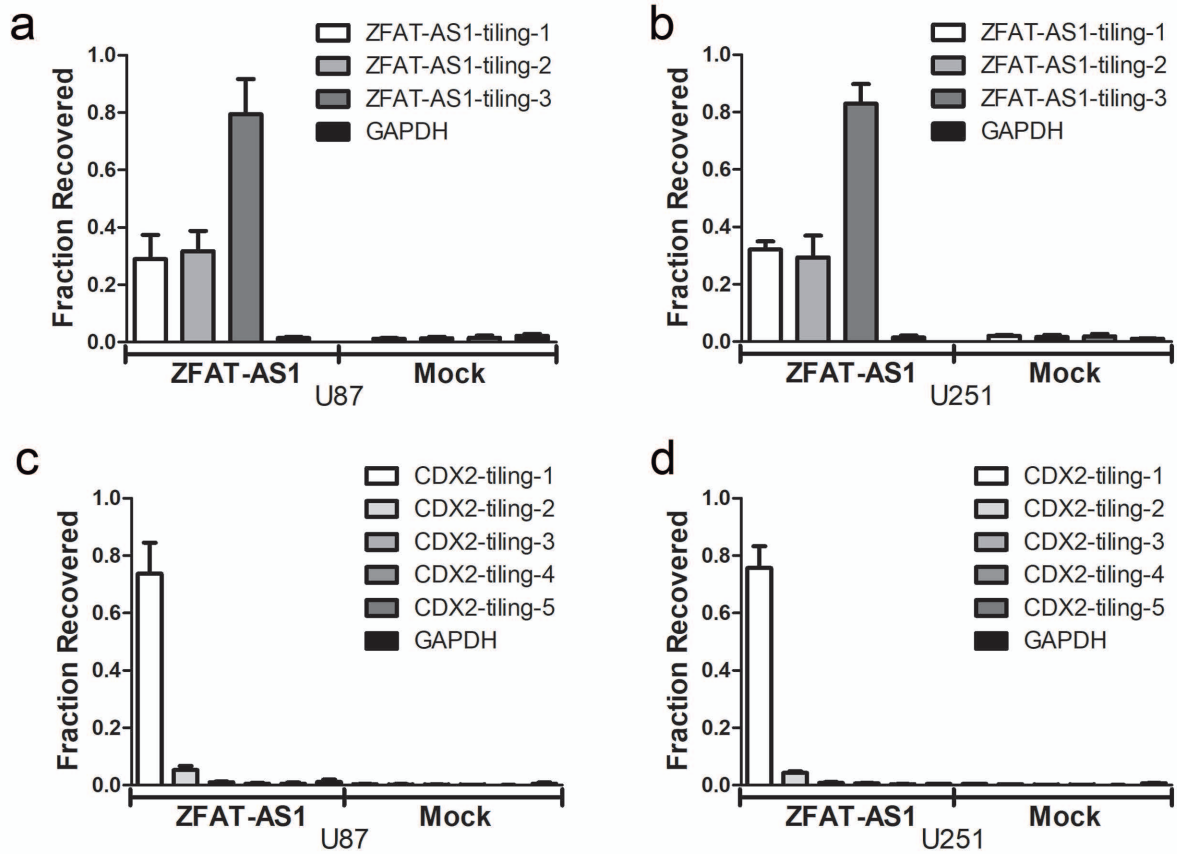

**Figure S3. ZFAT-AS1 was present at the promoter region of CDX2 in Chromatin immunoprecipitation assay.**

**a b** ZFAT-AS1 obtained 35-87% retrieval using tiling probes from the RNA fraction recovered in chromatin isolation by RNA purification (ChIRP). **c d** The promoter region 0-500bp of CDX2 (CDX2-tiling-1) obtained ~80% retrieval and the promoter region 500-1000bp (CDX2-tiling-1) obtained ~4% retrieval from the DNA fraction recovered ChIRP. LacZ RNA used as the mock control.

**Table S1. The primers of DGCR8 mRNA, ZFAT-AS1, CDX2 mRNA, RRM2B mRNA in quantitative real-time PCR (qRT-PCR).**

| Primers   | Forward                        | Reverse                          |
|-----------|--------------------------------|----------------------------------|
| DGCR8:    | 5'-CGATGTGGATGCTCTGCTGGAAG-3'  | 5'-TCGGACGGATGGTCGCTGTC-3'       |
| ZFAT-AS1: | 5'-GGCTTGCTACTTACCAGTGCTGTG-3' | 5'-CCGATGGCTGTGACTACTCAACTC-3'   |
| CDX2:     | 5'-GGAGGACTGGAATGGCTACG-3'     | 5'-CCTGGTTTTCACTTGGCTGC-3'       |
| RRM2B:    | 5'-GCCTGGCTTCGTCGTTGCG-3'      | 5'-TTCGTTGGTGTCTGAAGATGATCTCC-3' |

**Table S2. The primers for each PCR set, annealing temperatures, and the sizes of PCR products in Chromatin immunoprecipitation assay, to confirm the existence of H3K27me3 modification in CDX2 promoter region.**

| Primers of CDX2 promoter region in Chromatin immunoprecipitation assay | Forward                                           | annealing temperatures | Reverse                                 | annealing temperatures | products size |
|------------------------------------------------------------------------|---------------------------------------------------|------------------------|-----------------------------------------|------------------------|---------------|
| CDX2-PCR5:                                                             | 5'-AGTTTGCTTGGGAAGAA<br>AATATGCTTCACT-3'          | 74.0°C                 | 5'-AGTCCTTCTATACCTTGCACAGGAAACT<br>C-3' | 76.0°C                 | 500bp         |
| CDX2-PCR4:                                                             | 5'-ATATTATTGGATAGTTT<br>TATTTTCCTTTTTCAAA<br>T-3' | 76.3°C                 | 5'-AGCTCCCTCCCTGTTCAA-3'                | 56.0°C                 | 500bp         |
| CDX2-PCR3:                                                             | 5'-GTGTCAGTGATGTCTGG<br>ATTCAGGAG-3'              | 70.0°C                 | 5'-GAGCCTTTTGGCCTGCACTGA-3'             | 66.5°C                 | 500bp         |
| CDX2-PCR2:                                                             | 5'-CTAAGAAAGACGCCAAG<br>CACCTGG-3'                | 69.0°C                 | 5'-GAGTGCTCCAGCCATGGAAAGGA-3'           | 67.0°C                 | 500bp         |
| CDX2-PCR1:                                                             | 5'-CAAGTGAGCCTCGGGCT<br>TCC-3'                    | 66.2°C                 | 5'-AAACCCCGTTACAAAATCCGAATCATT<br>G-3'  | 70.0°C                 | 500bp         |

**Table S3. The primers of 500 bp-TSS of CDX2 amplified with the DNA precipitated by H3K27me3 to detect the percentage of relative to its corresponding input in qRT-PCR.**

| Primers           | Forward                      | Reverse                    | products size |
|-------------------|------------------------------|----------------------------|---------------|
| CDX2: -500 bp-TSS | 5'-TGGAGGTTAAAGTGCACCAGGT-3' | 5'-GACACCAATGGTTGGAGACG-3' | 187bp         |

**Table S4. The primers for each PCR set, annealing temperatures, and the sizes of PCR products in Chromatin immunoprecipitation assay, to confirm the binding sites for CDX2 in the promoter region of RRM2B and DGCR8.**

| Primers in Chromatin immunoprecipitation assay | Forward                             | annealing temperatures | Reverse                            | annealing temperatures | products size |
|------------------------------------------------|-------------------------------------|------------------------|------------------------------------|------------------------|---------------|
| PCR2 (Control-RRM2B)                           | 5'-<br>CATGTTGGTCAGGCTGGT<br>CT-3'  | 60.0°C                 | 5'-<br>AGATAACATTGGGGCC<br>AGGC-3' | 60.1°C                 | 113bp         |
| PCR1 (RRM2B-putative binding site)             | 5'-<br>GGCTTTCAGCATTTC AAC<br>GC-3' | 59.5°C                 | 5'-<br>TGACGGGATCTTGCCA<br>TGAC-3' | 60.1°C                 | 108bp         |
| PCR3 (Control-DGCR8)                           | 5'-<br>GAAGATGGCTCCTCAGTC<br>CA-3'  | 58.8°C                 | 5'-<br>TGAAGAGCAGACAAAC<br>CCCA-3' | 59.2°C                 | 107bp         |
| PCR2 (DGCR8-putative binding site 2)           | 5'-<br>ATCACTGCAGCCTGGAAC<br>TC-3'  | 60.0°C                 | 5'-<br>AAGTGCTGGGATTACA<br>GGCA-3' | 59.3°C                 | 148bp         |
| PCR1 (DGCR8-putative binding site 1)           | 5'-<br>GATACCAGCCTGGCCAAC<br>AT-3'  | 60.1°C                 | 5'-<br>AAGCGATTCTCTGGC<br>TCAC-3'  | 60.1°C                 | 121bp         |

**Table S5. The probes of ZFAT-AS1 and CDX2 in Chromatin Isolation by RNA Purification (ChIRP).**

| Probe name | Probe sequence (5'-> 3') | Position of first nucleotide of probe |
|------------|--------------------------|---------------------------------------|
| ZFAT-AS1_1 | GGTCATTAACAGCAACCACA     | 19                                    |
| ZFAT-AS1_2 | TTCTGAGAGGCTTATCTCTT     | 315                                   |
| ZFAT-AS1_3 | TGTCAGGAATGTGCACTGAG     | 426                                   |
| ZFAT-AS1_4 | TTCCTTTCACAGCAAGAGTC     | 507                                   |
| ZFAT-AS1_5 | TCACACAGCACTGGTAAGTA     | 679                                   |
| ZFAT-AS1_6 | AACATCTTGCTGAAGTGTC      | 759                                   |
| ZFAT-AS1_7 | GGCAAAC TTTTTTGGTACCA    | 900                                   |

| Probe name        | Probe sequence (5'-> 3') | Position of first nucleotide of probe |
|-------------------|--------------------------|---------------------------------------|
| ZFAT-AS1_tiling-1 | CACATGGTTCTTGGTAGGT      | 4                                     |
| ZFAT-AS1_tiling-2 | GGAGTGCAGGAATGTGCA       | 431                                   |
| ZFAT-AS1_tiling-3 | ACATCTTGCTGAAGTGTC       | 759                                   |
| CDX2_tiling-1     | AATCATTGAGAGAAGGGCAGTA   | 42                                    |
| CDX2_tiling-2     | CATTGTGAACACGAATGTTCC    | 548                                   |
| CDX2_tiling-3     | AGAGGCAAAC TGT TTTGGGAAG | 1158                                  |
| CDX2_tiling-4     | TTCAAAGGTCCTAATATTGCT    | 1535                                  |
| CDX2_tiling-5     | CTCAATAATGGTTGGTTGACC    | 2243                                  |
